# Supplementary material for: Unveiling the mechanism of action of acylated temporin L analogues against multidrug-resistant Candida albicans
Source: PubMed Central journal article supplement (PMC9621209; doi:10.1080/14756366.2022.2134359), 2022-10-28
Supplement: IENZ_A_2134359_SM1700.pdf [file IENZ_A_2134359_SM1700.pdf]

## *Supporting information*

# **Unveiling the mechanism of action of Acylated Temporin L analogues against multidrug-resistant *Candida albicans***

Rosa Bellavita,<sup>a</sup> Annarita Falanga<sup>b</sup>, Francesco Merlino,<sup>a</sup> Gabriella D'Auria,<sup>a</sup> Nicola Molfetta,<sup>a</sup> Anella Saviano,<sup>a</sup> Francesco Maione,<sup>a</sup> Umberto Galdiero,<sup>c</sup> Maria Rosaria Catania,<sup>c</sup> Stefania Galdiero,<sup>a</sup> Paolo Grieco,<sup>a</sup> Emanuela Roscetto,<sup>c\*</sup> Lucia Falcigno,<sup>a\*</sup> Elisabetta Buommino<sup>a</sup>

<sup>a</sup>Department of Pharmacy, University of Naples "Federico II", Via Domenico Montesano 49, 80138 Naples, Italy

<sup>b</sup>Department of Agricultural Science, University of Naples "Federico II", via Università 100, 80055, Portici, Italy

<sup>c</sup>Department of Molecular Medicine and Medical Biotechnology, University of Naples Federico II, Via S. Pansini 5, 80131 Naples, Italy.

### **Table of contents**

|                                                                                                                                   |   |
|-----------------------------------------------------------------------------------------------------------------------------------|---|
| 1. HPLC chromatograms and ESIMS of peptides <b>Pent-1B</b> , <b>Dec-1B</b> and <b>DEC-1B-K(Fam)</b> (Table S1)                    | 3 |
| 2. Proton chemical shifts (ppm) of <b>Pent-1B</b> in H <sub>2</sub> O/D <sub>2</sub> O 90/10 at 298 K referred to TSP. (Table S2) | 3 |
| 3. Proton chemical shifts (ppm) of <b>Pent-1B</b> in DPC R67 at 298 K referred to TSP. (Table S3)                                 | 4 |
| 4. Proton chemical shifts (ppm) of <b>Dec-1B</b> in H <sub>2</sub> O/D <sub>2</sub> O 90/10 at 298 K referred to TSP. (Table S4)  | 5 |
| 5. Proton chemical shifts (ppm) of <b>Dec-1B</b> in DPC R67 at 298 K referred to TSP. (Table S5)                                  | 6 |
| 6. CYANA structural statistic of <b>Pent-1B</b> and <b>Dec-1B</b> in free and micelle bound forms (Table S6)                      | 7 |

|                                                                                                                                                                           |    |
|---------------------------------------------------------------------------------------------------------------------------------------------------------------------------|----|
| 7. Chemical shift deviations from random coil values of $\alpha$ CH protons of <b>Pent-1B</b> and <b>Dec-1B</b> in H <sub>2</sub> O/D <sub>2</sub> O. (Figure S1)         | 8  |
| 8. Most relevant NOE contacts of peptides <b>Pent-1B</b> and <b>Dec-1B</b> in different media (Figure S2)                                                                 | 8  |
| 9. 700 MHz 1D <sup>1</sup> H spectra of <b>A)Pent-1B</b> and <b>B) Dec-1B</b> in H <sub>2</sub> O/D <sub>2</sub> O. (Figure S3)                                           | 9  |
| 10. Cartoon representation of the best 10 NMR/CYANA structures in H <sub>2</sub> O/D <sub>2</sub> O of peptides <b>A)Pent-1B</b> and <b>B) Dec-1B</b> (Figure S4)         | 9  |
| 11. 700 MHz 1D <sup>1</sup> H spectra of <b>A)Pent-1B</b> and <b>B) Dec-1B</b> in DPC (Figure S5)                                                                         | 10 |
| 12. Chemical shift deviations from random coil values of $\alpha$ CH protons of <b>Pent-1B</b> and <b>Dec-1B</b> in DPC, DPC/peptide molar ratio equal to 67.(Figure S6). | 11 |

**Table S1.** Analytical and ESIMS data of peptides **Pent-1B**, **Dec-1B** and **Dec-1B-K(Fam)**.

| Peptide              | Retention time (t <sub>R</sub> ) | Mass calculated | Mass found                   |
|----------------------|----------------------------------|-----------------|------------------------------|
| <b>Pent-1B</b>       | 14.4                             | 1779.2          | [M+3H] <sup>+</sup> /3=594.2 |
| <b>Dec-1B</b>        | 15.9                             | 1848.2          | [M+3H] <sup>+</sup> /3=617.6 |
| <b>Dec-1B-K(Fam)</b> | 15.1                             | 2334.3          | [M+3H] <sup>+</sup> /3=779.9 |

**Table S2.** Proton chemical shifts (ppm) of **Pent-1B** in H<sub>2</sub>O/D<sub>2</sub>O 90/10 at 298 K referred to TSP.

| Residue                   | NH   | αH   | βH         | γH   | others                                                |
|---------------------------|------|------|------------|------|-------------------------------------------------------|
| <b>Phe</b> <sup>1</sup>   | --   | 4.29 | 3.19, 3.09 |      | HD 7.18, HE 7.37*                                     |
| <b>Val</b> <sup>2</sup>   | 8.32 | 4.34 | 1.81       | 0.83 |                                                       |
| <b>Pro</b> <sup>3</sup>   | --   | 4.28 | 1.94, 1.69 | 2.14 | δCH <sub>2</sub> 3.54, 3.66                           |
| <b>Trp</b> <sup>4</sup>   | 7.75 | 4.57 | 3.27, 3.21 |      | 2H 7.19; 4H 7.56; 5H 7.25; 6H 7.14; 7H 7.51; NH 10.16 |
| <b>Phe</b> <sup>5</sup>   | 7.58 | 4.49 | 2.87       |      | HD 7.07, HE 7.30                                      |
| <b>Ser</b> <sup>6</sup>   | 7.99 | 4.30 | 3.81, 3.74 |      |                                                       |
| <b>Lys</b> <sup>7</sup>   | 8.16 | 4.23 | 1.67       | 1.21 | δCH <sub>2</sub> 1.62; εCH <sub>2</sub> 2.90          |
| <b>Phe</b> <sup>8</sup>   | 8.02 | 4.56 | 3.11, 2.99 |      | HD 7.25, HE 7.37                                      |
| <b>DLeu</b> <sup>9</sup>  | 8.01 | 4.19 | 1.49       | 1.16 | δCH <sub>3</sub> 0.82, 0.76                           |
| <b>DLys</b> <sup>10</sup> | 8.25 | 4.23 | 1.45       | 1.38 | δCH <sub>2</sub> 1.79; εCH <sub>2</sub> 2.97          |
| <b>Arg</b> <sup>11</sup>  | 8.00 | 4.32 | 1.81, 1.70 | 1.54 | δCH <sub>2</sub> 3.13; εNH 7.14                       |
| <b>Ile</b> <sup>12</sup>  | 8.23 | 4.13 | 1.84       | 1.45 | γCH <sub>3</sub> 1.16, δCH <sub>3</sub> 0.88          |
| <b>Leu</b> <sup>13</sup>  | 8.26 | 4.32 | 1.60       | 1.60 | δCH <sub>3</sub> 0.86                                 |

\* Side chain modified NH-CO-CH<sub>2</sub>CH<sub>2</sub>CH<sub>2</sub>CH<sub>3</sub>: 9.72, 2.31, 1.61, 1.33, 0.89 ppm  
 CONH<sub>2</sub> ter 7.49, 7.04 ppm.

**Table S3.** Proton chemical shifts (ppm) of **Pent-1B** in DPC R67 at 298 K referred to TSP.

| Residue                   | NH   | $\alpha$ H | $\beta$ H  | $\gamma$ H             | others                                                         |
|---------------------------|------|------------|------------|------------------------|----------------------------------------------------------------|
| <b>Phe</b> <sup>1</sup>   | --   | --         | 3.14, 3.04 |                        | HD 7.21, HE 7.57*                                              |
| <b>Val</b> <sup>2</sup>   | --   | 4.31       | 1.92       | 0.85                   |                                                                |
| <b>Pro</b> <sup>3</sup>   | --   | 4.52       | 2.31, 1.88 | 2.01                   | $\delta$ CH <sub>2</sub> 3.68, 3.86                            |
| <b>Trp</b> <sup>4</sup>   | --   | 4.43       | 3.34, 3.17 |                        | 2H 7.42; 4H 7.34; 5H 6.90;<br>6H 7.03; 7H 7.46; NH 10.78       |
| <b>Phe</b> <sup>5</sup>   | --   | 4.34       | 2.96, 2.87 |                        | HD 7.22, HE 7.13                                               |
| <b>Ser</b> <sup>6</sup>   | 8.30 | 4.16       | 3.95, 3.90 |                        |                                                                |
| <b>Lys</b> <sup>7</sup>   | 8.09 | 4.19       | 1.76       | 1.27                   | $\delta$ CH <sub>2</sub> 1.58; $\epsilon$ CH <sub>2</sub> 2.90 |
| <b>Phe</b> <sup>8</sup>   | 8.06 | 4.45       | 3.06       |                        | HD 7.22, HE 7.14                                               |
| <b>DLeu</b> <sup>9</sup>  | 8.60 | 3.82       | 1.69       | 1.46                   | $\delta$ CH <sub>3</sub> 0.85, 0.75                            |
| <b>DLys</b> <sup>10</sup> | 8.41 | 3.91       | 1.98, 1.80 | 1.40                   | $\delta$ CH <sub>2</sub> 1.68; $\epsilon$ CH <sub>2</sub> 2.95 |
| <b>Arg</b> <sup>11</sup>  | 8.10 | 4.12       | 1.93       | 1.69                   | $\delta$ CH <sub>2</sub> 3.25, 3.19                            |
| <b>Ile</b> <sup>12</sup>  | 7.70 | 4.00       | 1.89       | 1.36, 1.18             | $\gamma$ CH <sub>3</sub> 0.87, $\delta$ CH <sub>3</sub> 0.77   |
| <b>Ser</b> <sup>13</sup>  | 8.00 | 4.26       | 1.74       | 1.98, 2.24, 1.57, 1.30 | $\delta$ CH <sub>3</sub> 0.99                                  |

\* Side chain modified NH<sub>2</sub> CO-CH<sub>2</sub>-CH<sub>2</sub>-CH<sub>2</sub>-CH<sub>3</sub>; CONH<sub>2</sub> ter 7.25 ppm.

**Table S4.** Proton chemical shifts (ppm) of **Dec-1B** in H<sub>2</sub>O/D<sub>2</sub>O 90/10 at 298 K referred to TSP.

| Residue                   | NH   | $\alpha$ H | $\beta$ H  | $\gamma$ H | others                                                         |
|---------------------------|------|------------|------------|------------|----------------------------------------------------------------|
| <b>Phe</b> <sup>1</sup>   | --   | 4.29       | 3.23, 3.06 |            | HD 7.18, HE 7.38*                                              |
| <b>Val</b> <sup>2</sup>   | 8.30 | 4.33       | 1.80       | 0.82       |                                                                |
| <b>Pro</b> <sup>3</sup>   | --   | 4.29       | 2.14, 1.94 | 1.71       | $\delta$ CH <sub>2</sub> 3.56, 3.66                            |
| <b>Trp</b> <sup>4</sup>   | 7.74 | 4.56       | 3.26, 3.20 |            | 2H 7.18; 4H 7.50; 5H 7.24; 6H 7.14; 7H 7.57; NH 10.17          |
| <b>Phe</b> <sup>5</sup>   | 7.58 | 4.50       | 2.87       |            | HD 7.07, HE 7.29                                               |
| <b>Ser</b> <sup>6</sup>   | 7.99 | 4.31       | 3.82, 3.75 |            |                                                                |
| <b>Lys</b> <sup>7</sup>   | 8.17 | 4.21       | 1.66       | 1.20       | $\delta$ CH <sub>2</sub> 1.58; $\epsilon$ CH <sub>2</sub> 2.89 |
| <b>Phe</b> <sup>8</sup>   | 8.03 | 4.56       | 3.11, 2.98 |            | HD 7.24, HE 7.37                                               |
| <b>DLeu</b> <sup>9</sup>  | 8.00 | 4.20       | 1.49       | 1.18       | $\delta$ CH <sub>3</sub> 0.82, 0.76                            |
| <b>DLys</b> <sup>10</sup> | 8.27 | 4.24       | 1.66       | 1.44, 1.37 | $\delta$ CH <sub>2</sub> 1.79; $\epsilon$ CH <sub>2</sub> 2.96 |
| <b>Arg</b> <sup>11</sup>  | 8.01 | 4.34       | 1.81, 1.69 | 1.54       | $\delta$ CH <sub>2</sub> 3.12; $\epsilon$ NH 7.15              |
| <b>Ile</b> <sup>12</sup>  | 8.24 | 4.14       | 1.84       | 1.46, 1.15 | $\gamma$ CH <sub>3</sub> 0.88, $\delta$ CH <sub>3</sub> 0.85   |
| <b>Leu</b> <sup>13</sup>  | 8.26 | 4.32       | 1.57       | 1.22       | $\delta$ CH <sub>3</sub> 0.89, 0.82                            |

\* Side chain modified NH-CO(CH<sub>2</sub>)<sub>8</sub>CH<sub>3</sub>: 9.73, 2.29, 1.61, 1.27, 0.83 ppm

CONH<sub>2</sub> ter 7.50, 7.05 ppm.

**Table S5.** Proton chemical shifts (ppm) of **Dec-1B** in DPC R67 at 298 K referred to TSP.

| <b>Residue</b>           | <b>NH</b> | <b><math>\alpha</math>H</b> | <b><math>\beta</math>H</b> | <b><math>\gamma</math>H</b> | <b>others</b>                                                                         |
|--------------------------|-----------|-----------------------------|----------------------------|-----------------------------|---------------------------------------------------------------------------------------|
| <b>Phe<sup>1</sup></b>   | --        | 4.25                        | 3.32, 3.02                 |                             | HD 7.18, HE 7.58*                                                                     |
| <b>Val<sup>2</sup></b>   | 8.32      | 4.30                        | 1.88                       | 0.89, 0.83                  |                                                                                       |
| <b>Pro<sup>3</sup></b>   | --        | 4.58                        | 2.30                       | 1.95, 1.83                  | $\delta$ CH <sub>2</sub> 3.65, 3.83                                                   |
| <b>Trp<sup>4</sup></b>   | --        | 4.45                        | 3.24, 3.05                 |                             | 2H 7.35; 4H 7.34; 5H 6.88;<br>6H 7.03; 7H 7.46; NH 10.70                              |
| <b>Phe<sup>5</sup></b>   | 7.61      | 4.10                        | 3.22, 3.15                 |                             | HD 7.10, HE 7.19                                                                      |
| <b>Ser<sup>6</sup></b>   | 8.38      | 4.10                        | 3.89, 3.84                 |                             |                                                                                       |
| <b>Lys<sup>7</sup></b>   | 8.13      | 4.16                        | 1.75                       | 1.24                        | $\delta$ CH <sub>2</sub> 1.59; $\epsilon$ CH <sub>2</sub> 2.88; $\epsilon$ NH<br>7.61 |
| <b>Phe<sup>8</sup></b>   | 8.07      | 4.45                        | 3.08, 3.04                 |                             | HD 7.08, HE 7.18                                                                      |
| <b>DLeu<sup>9</sup></b>  | 8.56      | 3.78                        | 1.66                       | 1.41                        | $\delta$ CH <sub>3</sub> 0.80, 0.70                                                   |
| <b>DLys<sup>10</sup></b> | 8.42      | 3.87                        | 1.94, 1.76                 | 1.37                        | $\delta$ CH <sub>2</sub> 1.64; $\epsilon$ CH <sub>2</sub> 2.92 $\epsilon$ NH<br>7.69  |
| <b>Arg<sup>11</sup></b>  | 8.06      | 4.09                        | 1.91                       | 1.67                        | $\delta$ CH <sub>2</sub> 3.16                                                         |
| <b>Ile<sup>12</sup></b>  | 7.68      | 3.96                        | 1.86                       | 1.32, 1.14                  | $\gamma$ CH <sub>3</sub> 0.84, $\delta$ CH <sub>3</sub> 0.75                          |
| <b>Leu<sup>13</sup></b>  | 7.95      | 4.23                        | 1.67                       | 1.61                        | $\delta$ CH <sub>3</sub> 0.88                                                         |

\*Side chain modified NH-CO(CH<sub>2</sub>)<sub>8</sub>CH<sub>3</sub>: 9.94, 2.01, 1.42, 1.11 1.08, 0.82 ppm.  
CONH<sub>2</sub> ter 7.22 ppm.

**Table S6.** CYANA structural statistic of **Pent-1B** and **Dec-1B** in free and micelle bound forms

|                                                                          | <b>Pent-1B in water</b>    | <b>Pent-1B in DPC*</b>     | <b>Dec-1B in water</b>     | <b>Dec-1B in DPC*</b>      |
|--------------------------------------------------------------------------|----------------------------|----------------------------|----------------------------|----------------------------|
| distance restraints                                                      | 169                        | 191                        | 169                        | 246                        |
| intraresidue                                                             | 128                        | 127                        | 138                        | 156                        |
| sequential ( $ i - j  = 1$ )                                             | 33                         | 33                         | 29                         | 45                         |
| medium-range ( $1 <  i - j  \leq 4$ )                                    | 8                          | 31                         | 2                          | 45                         |
| <b>Violation statistics (100 structures)</b>                             |                            |                            |                            |                            |
| CYANA TF ( $\text{\AA}^2$ )                                              | $0.30 \pm 0.39$            | $2.20 \pm 1.76$            | $0.037 \pm 0.026$          | $0.30 \pm 0.34$            |
| <b>Residual Distance Constraint Violations (<math>\text{\AA}</math>)</b> |                            |                            |                            |                            |
| number $> 0.2 \text{\AA}$                                                | 0                          | 0                          | 0                          | 0                          |
| mean global backbone RMSD                                                | $2.98 \pm 0.46 \text{\AA}$ | $1.43 \pm 0.48 \text{\AA}$ | $2.94 \pm 0.59 \text{\AA}$ | $0.74 \pm 0.75 \text{\AA}$ |
| mean global heavy atom                                                   | $4.74 \pm 0.44 \text{\AA}$ | $2.50 \pm 0.66 \text{\AA}$ | $4.78 \pm 0.55 \text{\AA}$ | $1.68 \pm 0.94 \text{\AA}$ |

\*R DPC/peptide = 67.

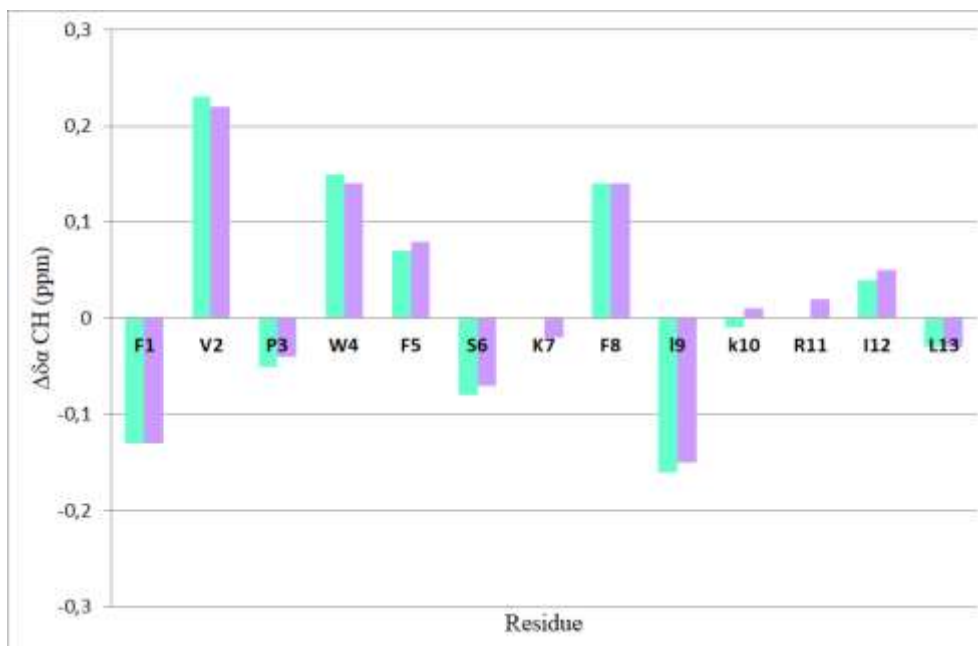

**Figure S1.** Chemical shift deviations from random coil values of  $\alpha$ CH protons of **Pent-1B** (pale cyan bars) and **Dec-1B** (violet bars) in H<sub>2</sub>O/D<sub>2</sub>O (90/10, v/v).

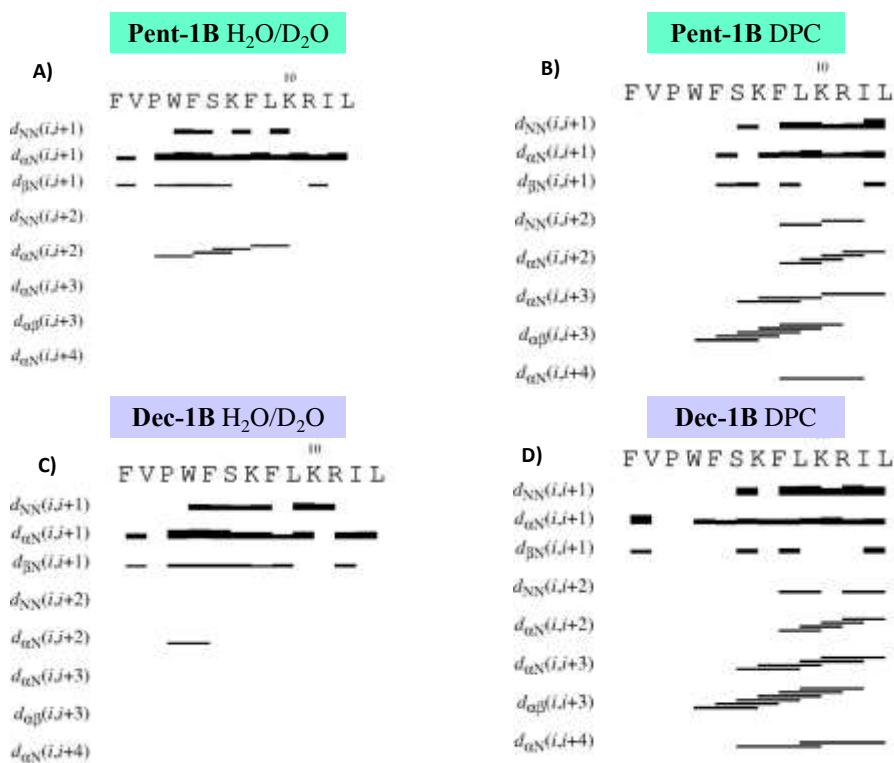

**Figure S2.** Most relevant NOE contacts of peptides in different media: A) **Pent-1B** H<sub>2</sub>O/D<sub>2</sub>O 90/10 v/v; B) **Pent-1B** in DPC 20 mM, DPC/peptide ratio R: 67; C) **Dec-1B** H<sub>2</sub>O/D<sub>2</sub>O 90/10 v/v; D) **Dec-1B** in DPC 40 mM, DPC/peptide ratio R: 67.



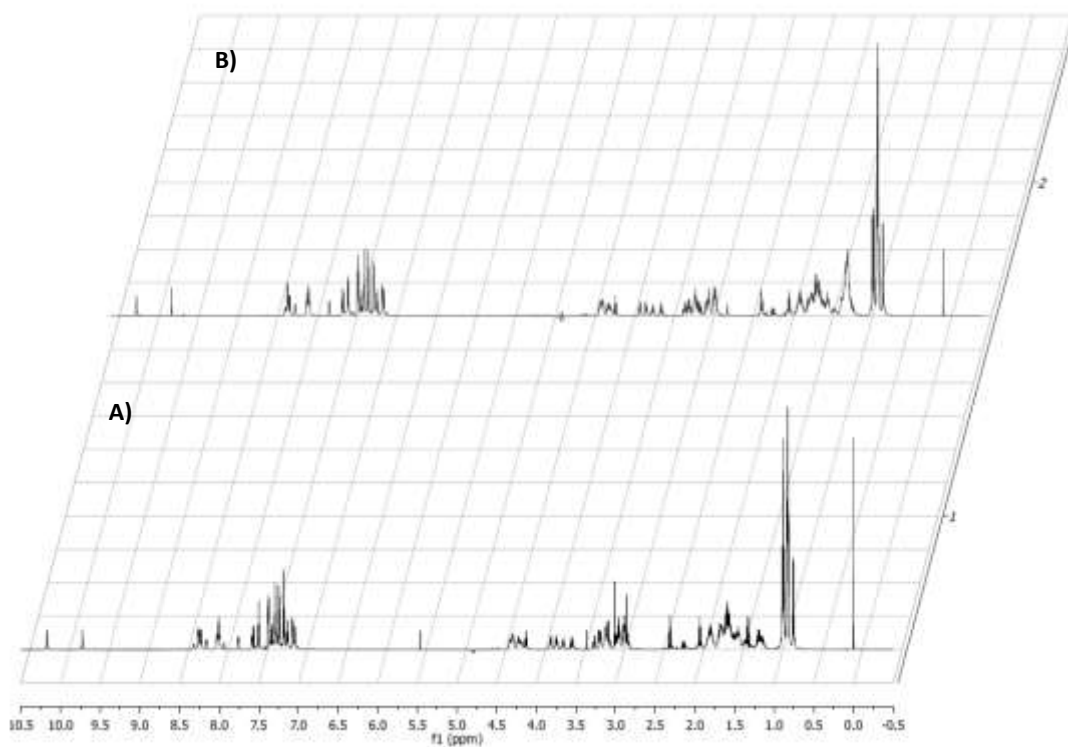

**Figure S3.** 700 MHz 1D  $^1\text{H}$  spectra of A) **Pent-1B** (black) and B) **Dec-1B** (dark grey) in  $\text{H}_2\text{O}/\text{D}_2\text{O}$  (90:10, v:v)

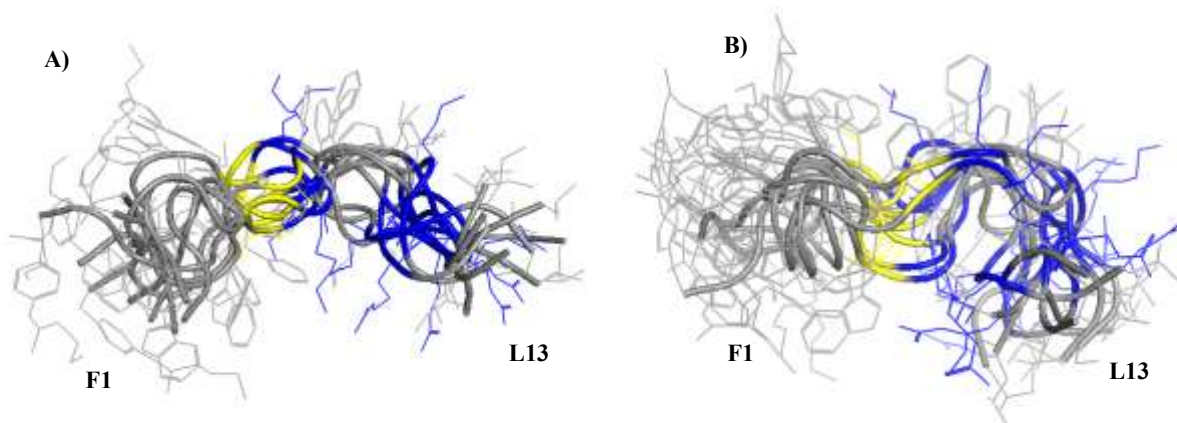

**Figure S4.** Cartoon representation of the best 10 NMR/CYANA structures in  $\text{H}_2\text{O}/\text{D}_2\text{O}$  (90:10, v:v) of A) **Pent-1B** and B) **Dec-1B**, visualized by PYMOL. Side-chains are shown as sticks coloured by amino acid type: grey, hydrophobic; blue, basic; yellow, polar.

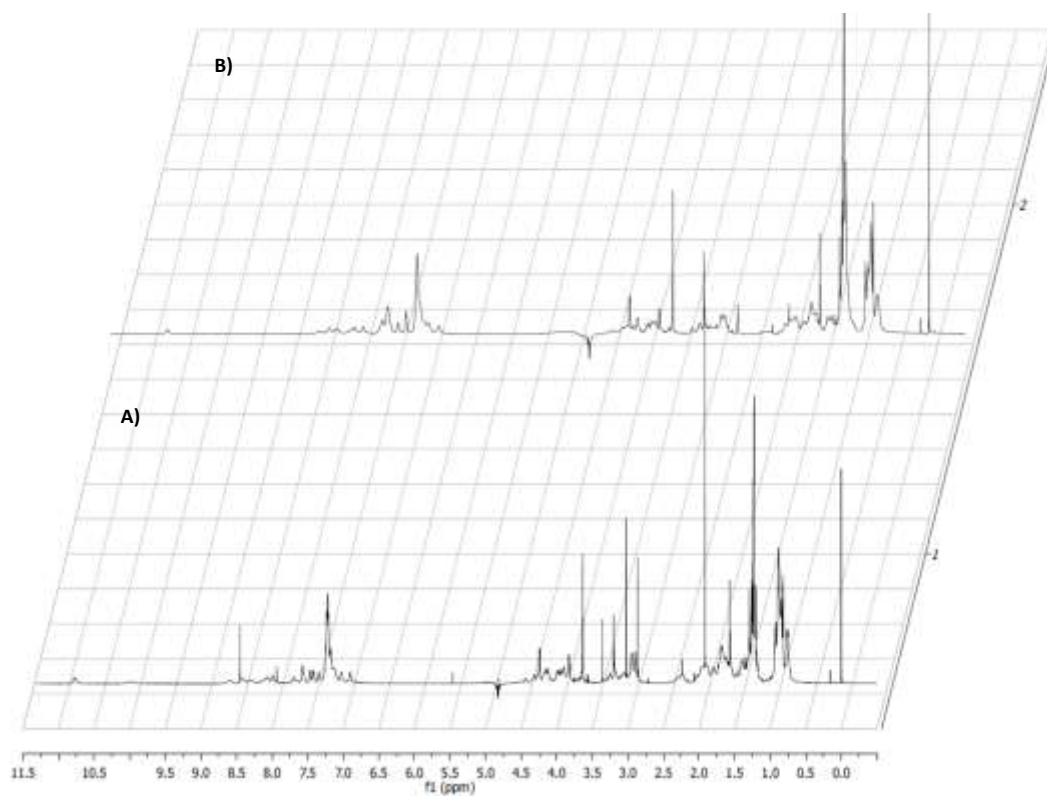

**Figure S5.** 700 MHz 1D  $^1\text{H}$  spectra of A) **Pent-1B** (black) and B) **Dec-1B** (dark grey) in DPC, DPC/peptide molar ratio equal to 67.

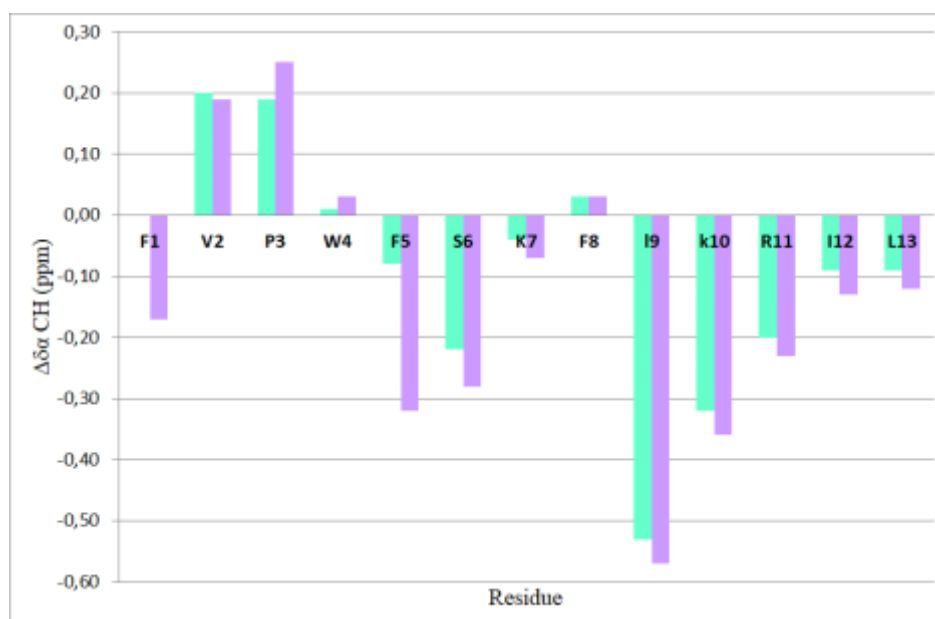

**Figure S6.** Chemical shift deviations from random coil values of  $\alpha$ CH protons of **Pent-1B** in DPC 20 mM, DPC/peptide ratio R: 67 (pale cyan bars) and **Dec-1B** in DPC 40 mM, DPC/peptide ratio R: 67 (violet bars).
